# Supplementary material
Source: HighWire-hosted journal article supplement (http://bmjopenquality.bmj.com/highwire/filestream/136172/field_highwire_adjunct_files/0/ds1993.pdf)
Supplement: ds1993.pdf [file ds1993.pdf]

**Table 1 – Results for each standard across the three audit cycles**

|                                                                                                                                | <b>Initial audit<br/>(n=19)</b> | <b>Second audit<br/>cycle (n=17)</b> | <b>Third audit<br/>cycle (n=17)</b> |
|--------------------------------------------------------------------------------------------------------------------------------|---------------------------------|--------------------------------------|-------------------------------------|
| <b>Standard 1: Was the patient identified in pre-operative assessment clinic and placed on EVTEP programme?</b>                |                                 |                                      |                                     |
| Yes                                                                                                                            | 11%                             | 82%                                  | 88%                                 |
| No                                                                                                                             | 89%                             | 0%                                   | 12%                                 |
| Unknown                                                                                                                        | 0%                              | 18%                                  | 0%                                  |
| <b>Standard 2: Was the patient given information regarding VTE and EVTE in pre-operative assessment clinic?</b>                |                                 |                                      |                                     |
| Yes                                                                                                                            | 16%                             | 82%                                  | 76%                                 |
| No                                                                                                                             | 84%                             | 12%                                  | 24%                                 |
| Unknown                                                                                                                        | 0%                              | 6%                                   | 0%                                  |
| <b>Standard 3: Was the patient warned about potential side-effects and what to do if experienced?</b>                          |                                 |                                      |                                     |
| Yes                                                                                                                            | 5%                              | 18%                                  | 82%                                 |
| No                                                                                                                             | 95%                             | 82%                                  | 18%                                 |
| <b>Standard 4: Was there a sticker affixed to front of patient's drug chart highlighting the fact that they are for EVTEP?</b> |                                 |                                      |                                     |
| Yes                                                                                                                            | 37%                             | 35%                                  | 59%                                 |
| No                                                                                                                             | 63%                             | 65%                                  | 41%                                 |
| <b>Standard 5: Was the patient taught how to self-inject whilst on the ward?</b>                                               |                                 |                                      |                                     |
| Yes                                                                                                                            | 32%                             | 87%                                  | 100%                                |
| No                                                                                                                             | 5%                              | 0%                                   | 0%                                  |
| Unknown                                                                                                                        | 63%                             | 13%                                  | 0%                                  |
| <b>Standard 6: Was the patient taught how to safely dispose of syringes?</b>                                                   |                                 |                                      |                                     |
| Yes                                                                                                                            | 63%                             | 54%                                  | 88%                                 |
| No                                                                                                                             | 0%                              | 13%                                  | 6%                                  |
| Unknown                                                                                                                        | 37%                             | 33%                                  | 6%                                  |
| <b>Standard 7: Was the patient confident with EVTEP and self-administration at discharge?</b>                                  |                                 |                                      |                                     |
| Yes                                                                                                                            | 20%                             | 67%                                  | 88%                                 |
| No                                                                                                                             | 0%                              | 0%                                   | 12%                                 |
| Unknown                                                                                                                        | 80%                             | 33%                                  | 0%                                  |
| <b>Standard 8: Was the patient's discharge letter correctly completed and GP advised about monitoring?</b>                     |                                 |                                      |                                     |
| Yes                                                                                                                            | 33%                             | 100%                                 | 88%                                 |
| No                                                                                                                             | 67%                             | 0%                                   | 12%                                 |
| <b>Was the patient prescribed EVTEP on discharge?</b>                                                                          |                                 |                                      |                                     |
| Yes                                                                                                                            | 44%                             | 100%                                 | 100%                                |
| No                                                                                                                             | 56%                             | 0%                                   | 0%                                  |
